# Supplementary material
Source: Springer Nature journal article supplement (https://www.springermedizin.de/resource/supplementary/12991_2009_1001_MOESM1_ESM.pdf/9615548)
Supplement: MOESM1 [file 9615548]

| Hospital/Facility                                                                                                                                                                                                                                                                                                                                                                                                                                                                                                                                                                                                                                                                                                          | Location                                                                                                                                                                                                                                                                                                                                                                                                                                                                   | Services provided                                                                                                                                                                                                                                                                                                                                                                                                                       |
|----------------------------------------------------------------------------------------------------------------------------------------------------------------------------------------------------------------------------------------------------------------------------------------------------------------------------------------------------------------------------------------------------------------------------------------------------------------------------------------------------------------------------------------------------------------------------------------------------------------------------------------------------------------------------------------------------------------------------|----------------------------------------------------------------------------------------------------------------------------------------------------------------------------------------------------------------------------------------------------------------------------------------------------------------------------------------------------------------------------------------------------------------------------------------------------------------------------|-----------------------------------------------------------------------------------------------------------------------------------------------------------------------------------------------------------------------------------------------------------------------------------------------------------------------------------------------------------------------------------------------------------------------------------------|
| <p style="text-align: center;"><b>National level</b></p> <p>1. Kenyatta National Hospital</p> <p style="text-align: center;">↑</p> <p style="text-align: center;"><b>Provincial level</b></p> <p>2. Embu Provincial Hospital</p> <p style="text-align: center;">↑</p> <p style="text-align: center;"><b>District level</b></p> <p>3. Kiambu District Hospital</p> <p>4. Kajiado District Hospital</p> <p style="text-align: center;">↑</p> <p style="text-align: center;"><b>Sub-district level</b></p> <p>5. Naivasha Sub-district Hospital</p> <p>6. Makindu Sub-district Hospital</p> <p style="text-align: center;">↑</p> <p style="text-align: center;"><b>Health centre level</b></p> <p>7. Kibera Health Centre</p> | <p>1. Located in Nairobi city, referral national hospital</p> <p>2. Located north-west of Nairobi, urban agricultural setting</p> <p>3. Located north of Nairobi, rural agricultural setting</p> <p>4. Located south of Nairobi, rural pastoralist setting</p> <p>5. Located west of Nairobi, rural pastoralist setting</p> <p>6. Located east of Nairobi, rural agricultural/pastoralist setting</p> <p>7. Located in the western part of Nairobi, urban slum setting</p> | <p>1. All services provided<br/>All doctors are specialists</p> <p>2. All services provided<br/>Newly appointed doctors</p> <p>3 &amp; 4. All services provided<br/>Five or more doctors, 1 or 2 specialists</p> <p>5 &amp; 6. Limited services provided<br/>Generally 5 or less doctors, usually few specialists</p> <p>7. Primary health care reproductive services<br/>No doctors, mainly served by nurses and clinical officers</p> |
